# Supplementary material for: Redox and conductive underwater adhesive: an innovative electrode material for convenient construction of flexible and stretchable supercapacitors
Source: Royal Society of Chemistry journal article supplement (doi:10.1039/d1ta10603a), 2022-01-01
Supplement: d1ta10603a2.pdf [file d1ta10603a2.pdf]

## Supplementary Information

# Redox and Conductive Underwater Adhesive: An Innovative Electrode Material for Convenient Construction of Flexible and Stretchable Supercapacitor

Chuanling Mu, Xue Wang, Zhiyuan Ma, Xiaohuan Liu, and Wen Li\*

State Key Laboratory of Supramolecular Structure and Materials, College of  
Chemistry, Jilin University. Qianjin Avenue 2699, Changchun, 130012, China

Email: wenli@jlu.edu.cn

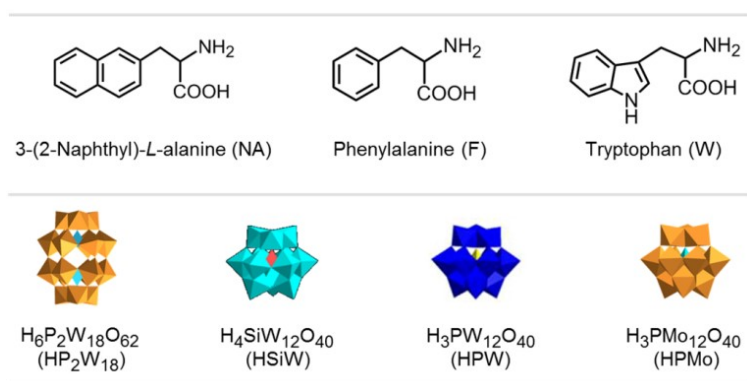

**Fig. S1** Schematic structures of the aromatic amino acids and heteropoly acids.

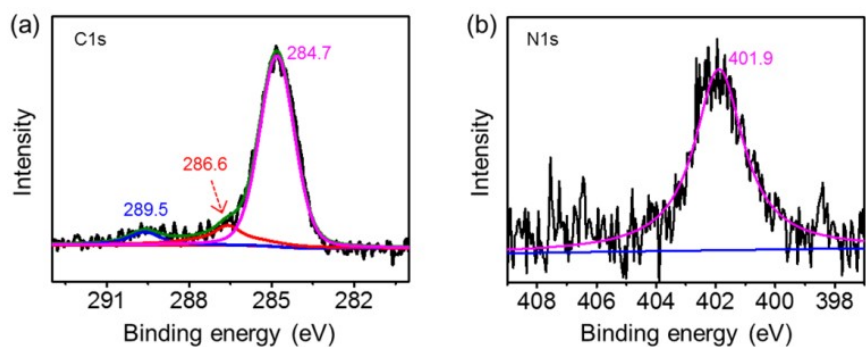

**Fig. S2** XPS spectra of the C1s (a) and N1s (b) of the NA/HP<sub>2</sub>W<sub>18</sub>/Ag adhesive.

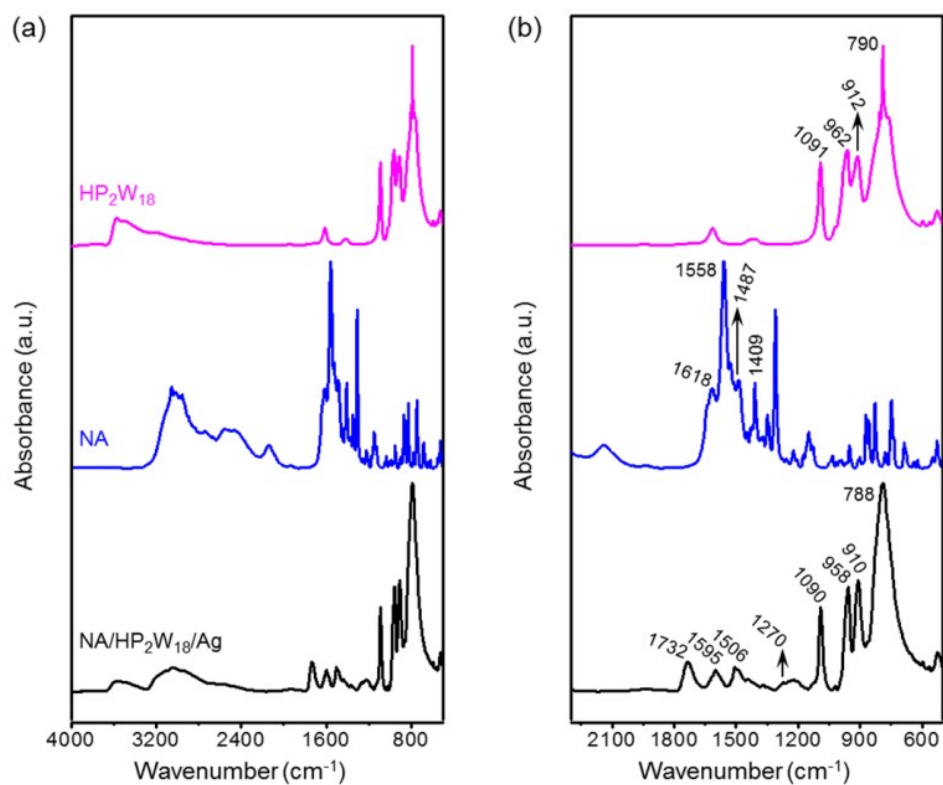

**Fig. S3** FT-IR spectra of HP<sub>2</sub>W<sub>18</sub>, NA and NA/HP<sub>2</sub>W<sub>18</sub>/Ag adhesive: (a) the full spectra in the range of 500-4000 cm<sup>-1</sup>, (b) the enlarged spectra from 500 to 2300 cm<sup>-1</sup>.

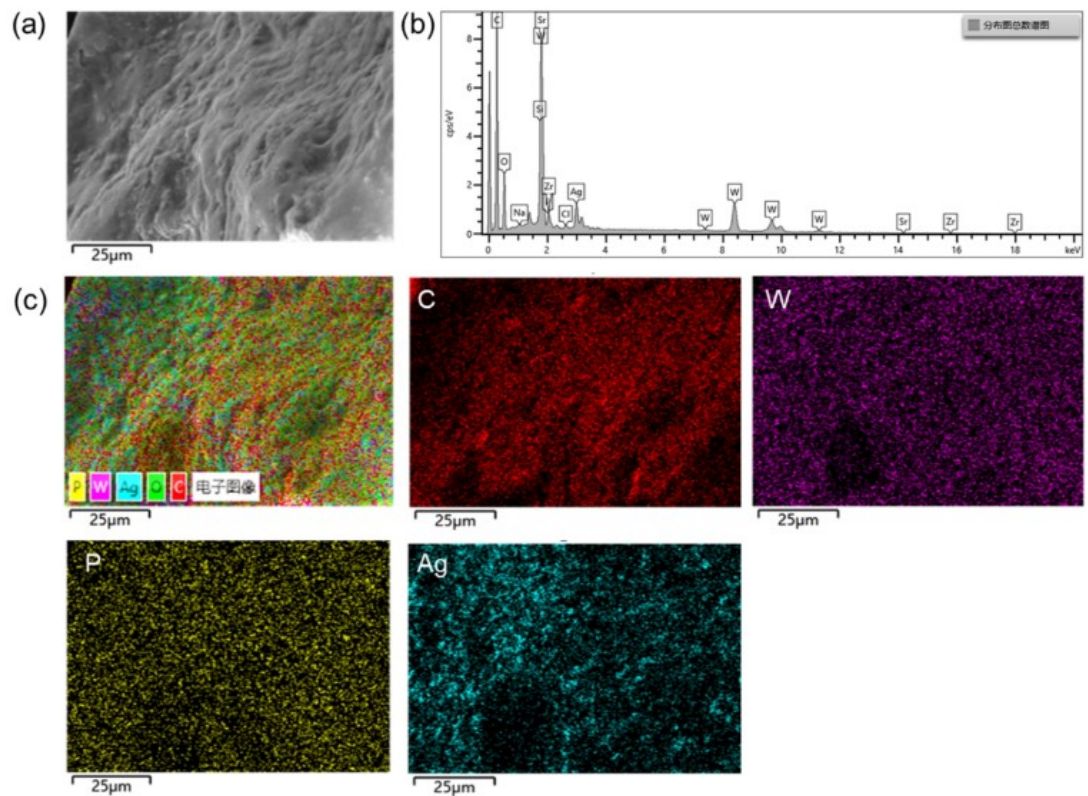

**Fig. S4** (a) SEM images of NA/HP<sub>2</sub>W<sub>18</sub>/Ag adhesive. (b) EDS spectrum of NA/HP<sub>2</sub>W<sub>18</sub>/Ag adhesive. (c) EDS mapping of NA/HP<sub>2</sub>W<sub>18</sub>/Ag adhesive, the elements C, W, P and Ag.

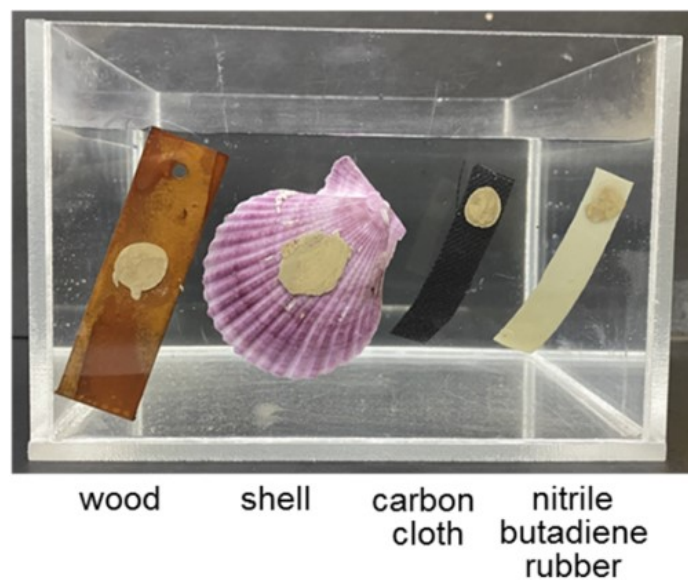

**Fig. S5** Digital images of NA/HP<sub>2</sub>W<sub>18</sub>/Ag adhesive attached on various dissimilar substrates.

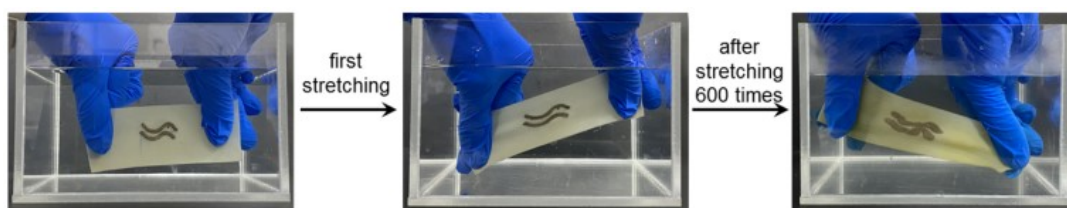

**Fig. S6** Photographs of NA/HP<sub>2</sub>W<sub>18</sub>/Ag adhesive printed onto nitrile-butadiene rubber bending with repeated stretching (600 times) under the water line.

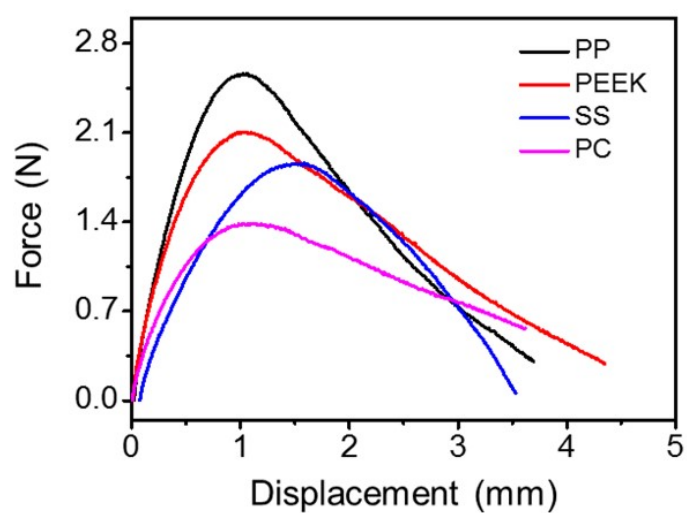

**Fig. S7** The force versus displacement curves were obtained when the adhered plates were separated at a rate of 10 mm min<sup>-1</sup>.

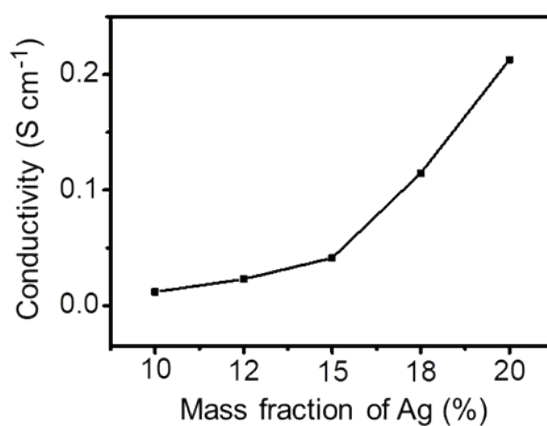

**Fig. S8** Conductivity of the NA/HP<sub>2</sub>W<sub>18</sub>/Ag adhesive with different mass fraction of Ag.

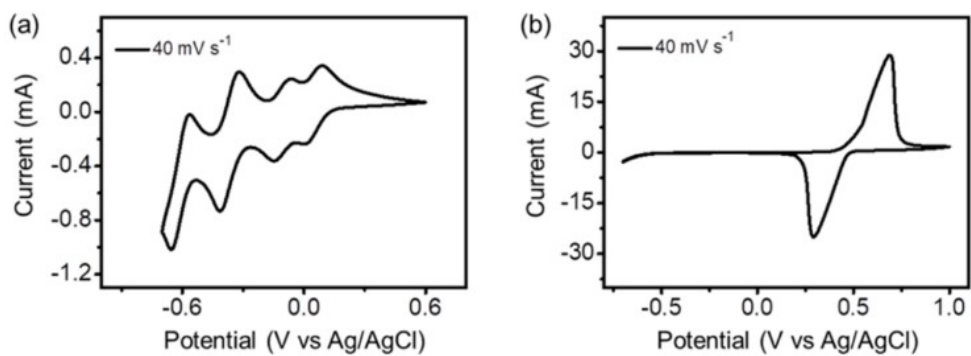

**Fig. S9** CV curves of the individual HP<sub>2</sub>W<sub>18</sub> (a) and Ag (b).

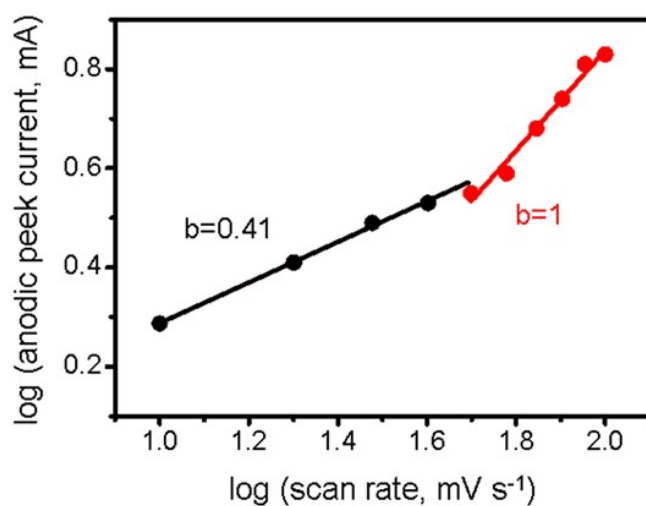

**Fig. S10** The log (anodic peak (II) current density) versus log (scan rate) to determine the b values for the CV curves in the scan rate range 10 ~ 100 mV s<sup>-1</sup>.

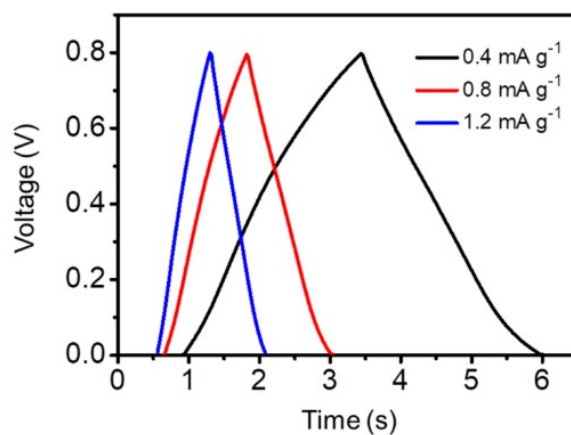

**Fig. S11** GCD curves (measured from 0.4 to 1.2 mA g<sup>-1</sup>) of the carbon paper working electrode.

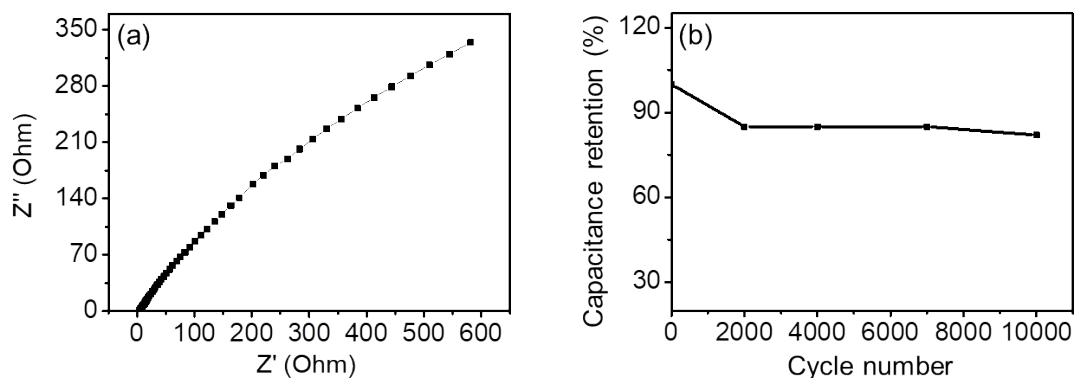

**Fig. S12** (a) EIS curve of the NA/HP<sub>2</sub>W<sub>18</sub>/Ag||PVA||NA/HP<sub>2</sub>W<sub>18</sub>/Ag SC in the frequency range of 100000 to 0.01 Hz; (b) Capacitance retention of the NA/HP<sub>2</sub>W<sub>18</sub>/Ag||PVA||NA/HP<sub>2</sub>W<sub>18</sub>/Ag SC during 10000 charge/discharge cycles.

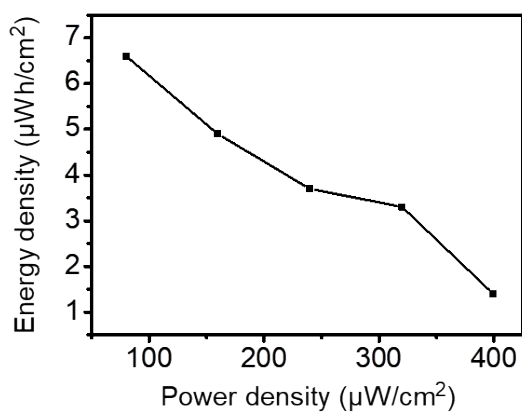

**Fig. S13** Ragone plot of the NA/HP<sub>2</sub>W<sub>18</sub>/Ag||PVA||NA/HP<sub>2</sub>W<sub>18</sub>/Ag.

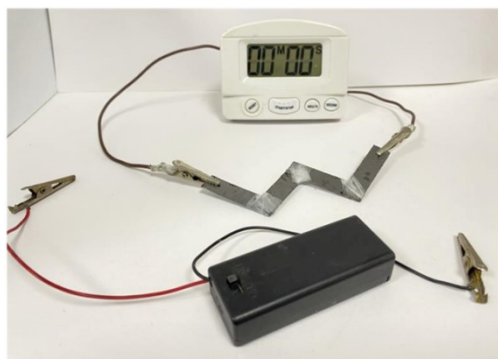

**Fig. S14** Three NA/HP<sub>2</sub>W<sub>18</sub>/Ag||PVA||NA/HP<sub>2</sub>W<sub>18</sub>/Ag SCs in series can light up the electronic watch for more than 3 minutes after charging with a commercial battery for 60 seconds.

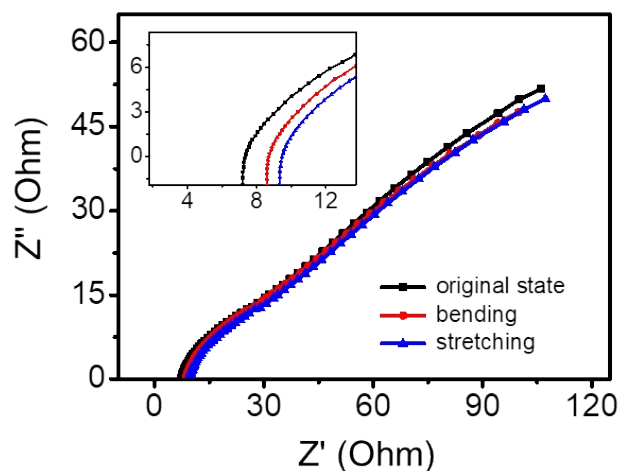

**Fig. S15** Nyquist plots of the NA/HP<sub>2</sub>W<sub>18</sub>/Ag||PVA||NA/HP<sub>2</sub>W<sub>18</sub>/Ag flexible supercapacitor: original state; bending angle: 180°; stretching ratio: 80%.

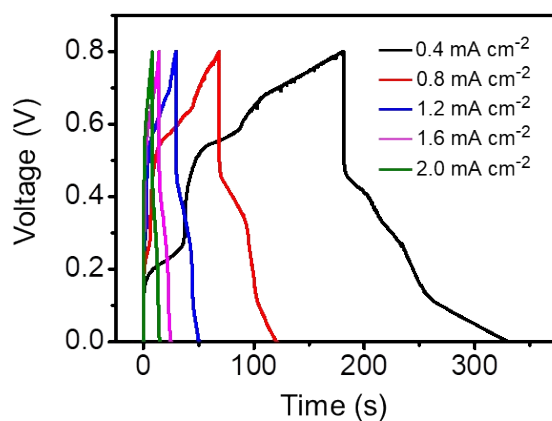

**Fig. S16** GCD curves of NA/HP<sub>2</sub>W<sub>18</sub>/Ag||PVA||NA/HP<sub>2</sub>W<sub>18</sub>/Ag flexible supercapacitor measured in the range of 0.4 ~ 2.0 mA cm<sup>-2</sup>.

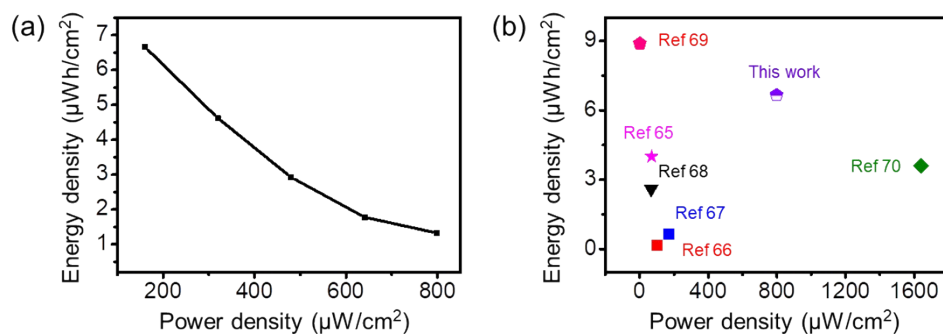

**Fig. S17** (a) Ragone plot of the NA/HP<sub>2</sub>W<sub>18</sub>/Ag||PVA||NA/HP<sub>2</sub>W<sub>18</sub>/Ag flexible supercapacitor. (b) Ragone plots of the stretchable supercapacitor in comparison with other stretchable supercapacitor devices.
